# Supplementary material for: The intrinsic coagulation pathway plays a dominant role in driving hypercoagulability in ANCA-associated vasculitis
Source: PubMed Central journal article supplement — Blood Adv. 2024 Jan 7;8(5):1295–304. doi: 10.1182/bloodadvances.2023011937 (PMC10918483; doi:10.1182/bloodadvances.2023011937), 2024-01-07
Supplement: BLOODA_ADV-2023-011937-mmc1.pdf [file BLOODA_ADV-2023-011937-mmc1.pdf]

**Supplemental data**

**Figure 1.** Flowchart of the included patients and datapoint assessments.

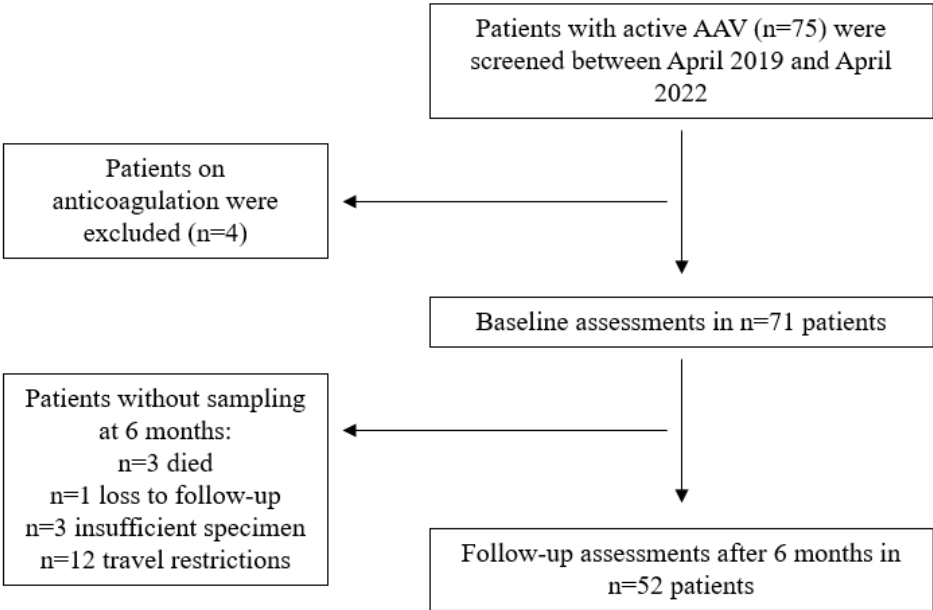

Abbreviations: AAV, antineutrophil cytoplasmic antibody-associated vasculitis.

**Table 1.** Baseline characteristics of patients with and without thrombosis prior to inclusion.

|                           | Normal range                                        | Thrombosis<br>n=4 | No Thrombosis<br>n=65 | Overall <i>P</i> |
|---------------------------|-----------------------------------------------------|-------------------|-----------------------|------------------|
| Male, (%)                 |                                                     | 1 (25)            | 41 (63)               | 0.898            |
| Age in years, (IQR)       |                                                     | 63 (55-67)        | 64 (56-74)            | 0.130            |
| BMI, (IQR)                | 18.5-25                                             | 30.5 (26.6-38.2)  | 25.7 (24.0-29.3)      | 0.053            |
| Diagnosis, (%)            |                                                     |                   |                       | 0.761            |
| MPA                       |                                                     | 1 (25)            | 21 (32)               |                  |
| GPA                       |                                                     | 3 (75)            | 44 (68)               |                  |
| ANCA, (%)                 |                                                     |                   |                       | 0.697            |
| MPO                       |                                                     | 1 (25)            | 28 (43)               |                  |
| PR3                       |                                                     | 3 (75)            | 35 (54)               |                  |
| Double positive           |                                                     | 0 (0)             | 2 (3)                 |                  |
| De novo presentation, (%) |                                                     | 2 (50)            | 37 (57)               | 0.786            |
| BVAS, (IQR)               |                                                     | 14 (11-20)        | 14 (12-17)            | 0.949            |
| Laboratory parameters     |                                                     |                   |                       |                  |
| Hemoglobin, (IQR)         | 8.2-11.0 <sup>†</sup> / 7.3-9.7 <sup>‡</sup> mmol/L | 6.9 (5.6-8.8)     | 7.3 (6.2-8.0)         | 0.754            |
| Platelet, (IQR)           | 130-350 x10 <sup>9</sup> /L                         | 361 (282-435)     | 331 (263-389)         | 0.450            |
| Leukocytes, (IQR)         | 3.5-11.0 x10 <sup>9</sup> /L                        | 10.0 (6.8-15.0)   | 8.5 (6.8-12.1)        | 0.532            |
| Serum creatinine, (IQR)   | 60-115 μmol/L                                       | 186 (72-425)      | 152 (95-229)          | 0.886            |
| CRP, (IQR)                | <10 mg/L                                            | 22 (13-68)        | 23 (7-45)             | 0.532            |
| IgG, (IQR)                | 7.0-16.0 g/L                                        | 13.4 (8.8-14.3)   | 11.8 (9.1-13.2)       | 0.579            |
| ANCA level, (IQR)         |                                                     | 83 (47-113)       | 72 (30-144)           | 0.761            |
| Coagulation parameters    |                                                     |                   |                       |                  |
| D-dimers, (IQR)           | <5.0 <sup>#</sup> μg/mL                             | 1.1 (0.3-1.8)     | 1.3 (0.6-2.7)         | 0.334            |
| Fibrinogen, (IQR)         | 1.7-4.0 g/L                                         | 7.1 (5.0-9.6)     | 6.2 (5.2-8.5)         | 0.731            |
| PT, (IQR)                 | 10-12 sec                                           | 9.6 (8.5-17.4)    | 8.7 (8.3-9.2)         | 0.233            |
| APTT, (IQR)               | 28-32 sec                                           | 26 (20-30)        | 27 (25-29)            | 0.397            |
| FVIIa:AT, (IQR)           | ≤2641 pM                                            | 875 (792-909)     | 751 (481-916)         | 0.272            |
| FXIIa:AT, (IQR)           | ≤118 pM                                             | 91 (29-2738)      | 59 (38-80)            | 0.835            |
| FXIIa:C1Inh, (IQR)        | ≤2166 pM                                            | 4752 (3782-6566)  | 3889 (3562-4279)      | 0.221            |
| FXIa:AT, (IQR)            | ≤43 pM                                              | 88 (62-412)       | 46 (25-93)            | 0.090            |
| FXIa:α1AT, (IQR)          | ≤29 pM                                              | 62 (26-296)       | 26 (15-37)            | 0.115            |
| FXIa:C1Inh, (IQR)         | ≤514 pM                                             | 269 (71-3654)     | 71 (71-209)           | 0.381            |
| FIXa:AT, (IQR)            | ≤472 pM                                             | 191 (127-2509)    | 277 (197-364)         | 0.341            |
| FXa:AT, (IQR)             | ≤279 pM                                             | 168 (145-464)     | 177 (164-206)         | 0.751            |
| T:AT, (IQR)               | ≤4.7 μg/L                                           | 2.0 (1.7-32.3)    | 3.1 (1.8-6.3)         | 0.711            |

The Mann-Whitney U test was used for continuous variables and the chi-square test or Fisher's exact test was used for categorical variables, when appropriate. Normal hemoglobin ranges for <sup>†</sup>males and <sup>‡</sup>females. <sup>#</sup>D-dimers normal range for age 50 years or younger, with an incremental increase of 0.1 for each year above 50.

Abbreviations: SD, standard deviation. IQR, interquartile range. BMI, body mass index. MPA, microscopic polyangiitis. GPA, granulomatosis with polyangiitis. EGPA, eosinophilic granulomatosis with polyangiitis. ANCA, anti-neutrophil cytoplasmic antibody. MPO, myeloperoxidase. PR3, proteinase 3. BVAS, Birmingham vasculitis activity score. ENT, ear, nose and throat. RTX, rituximab. CYC, cyclophosphamide. CRP, C-reactive protein. IgG, immunoglobulin G. PT, Prothrombin time. aPTT, activated partial thromboplastin time. FVIIa, activated FVII. AT, antithrombin. FXIIa, activated factor XII. C1Inh, C1 esterase inhibitor. FXIa, activated factor XI. α1AT, α1-antitrypsin. FIXa, activated factor IX. FXa, activated factor X. T:AT, thrombin in complex with antithrombin.

**Table 2. Correlation matrix between clinical and laboratory findings and coagulation in patients with active AAV.**

|                   | T:AT                |                | D-dimers            |                |
|-------------------|---------------------|----------------|---------------------|----------------|
|                   | Spearman's <i>r</i> | <i>P</i> value | Spearman's <i>r</i> | <i>P</i> value |
| Age in years      | 0.33                | <b>0.006</b>   | 0.36                | <b>0.003</b>   |
| AAV type          | 0.05                | 0.688          | - 0.05              | 0.683          |
| ANCA type         | 0.12                | 0.337          | - 0.01              | 0.938          |
| De novo diagnosis | 0.04                | 0.746          | 0.02                | 0.876          |
| BVAS              | 0.12                | 0.325          | 0.35                | <b>0.003</b>   |
| Fibrinogen        | - 0.09              | 0.475          | 0.08                | 0.523          |
| PT                | 0.28                | <b>0.018</b>   | 0.37                | <b>0.002</b>   |
| APTT              | - 0.15              | 0.205          | 0.07                | 0.569          |
| Hemoglobin        | - 0.10              | 0.404          | - 0.22              | 0.067          |
| Platelet          | 0.15                | 0.213          | 0.13                | 0.294          |
| Leukocytes        | 0.26                | <b>0.033</b>   | 0.14                | 0.258          |
| Serum creatinine  | 0.11                | 0.379          | 0.30                | <b>0.014</b>   |
| CRP               | 0.20                | 0.097          | 0.35                | <b>0.003</b>   |
| IgG               | 0.06                | 0.618          | 0.17                | 0.176          |
| ANCA level        | 0.15                | 0.244          | 0.27                | <b>0.028</b>   |
| Proteinuria       | 0.29                | <b>0.029</b>   | 0.40                | <b>0.002</b>   |

Spearman rank correlation coefficients were used. Blue color indicates a positive correlation and red color indicates a negative correlation.

Abbreviation: AAV type, either microscopic polyangiitis or granulomatosis with polyangiitis. ANCA type, either myeloperoxidase or proteinase 3. BVAS, Birmingham vasculitis activity score. PT, Prothrombin time. aPTT, activated partial thromboplastin time. CRP, C-reactive protein. IgG, immunoglobulin G.

**Table 3.** Logistic regression was performed to ascertain the effects of routine clinical and coagulation parameters at baseline on the likelihood of developing a VTE in patients with AAV.

| <b>Univariable</b> | <b>OR (95% CI)</b>  | <b>P value</b> |
|--------------------|---------------------|----------------|
| Hemoglobin         | 1.735 (0.795-3.790) | 0.167          |
| Platelet           | 0.999 (0.990-1.007) | 0.739          |
| Leukocytes         | 1.028 (0.827-1.277) | 0.802          |
| Serum creatinine   | 0.995 (0.984-1.007) | 0.443          |
| CRP                | 1.000 (0.984-1.017) | 0.981          |
| IgG                | 0.916 (0.660-1.270) | 0.598          |
| ANCA level         | 0.994 (0.978-1.010) | 0.451          |
| D-dimers           | 1.105 (0.987-1.237) | 0.083          |
| Fibrinogen         | 0.658 (0.376-1.152) | 0.143          |
| PT                 | 1.042 (0.628-1.729) | 0.875          |
| APTT               | 1.040 (0.906-1.194) | 0.578          |
| FVIIa:AT           | 0.999 (0.996-1.002) | 0.502          |
| FXIIa:AT           | 0.998 (0.986-1.009) | 0.701          |
| FXIIa:C1Inh        | 1.000 (0.999-1.001) | 0.845          |
| FXIa:AT            | 0.988 (0.959-1.017) | 0.400          |
| FXIa: $\alpha$ 1AT | 0.999 (0.988-1.010) | 0.795          |
| FXIa:C1Inh         | 0.998 (0.994-1.003) | 0.553          |
| FIXa:AT            | 0.998 (0.993-1.004) | 0.163          |
| FXa:AT             | 0.965 (0.931-1.001) | 0.054          |
| T:AT               | 1.029 (0.949-1.115) | 0.490          |

Abbreviations: 95% CI, 95% Confidence interval. CRP, C-reactive protein. IgG, immunoglobulin G. PT, Prothrombin time. aPTT, activated partial thromboplastin time. FVIIa, activated FVII. AT, antithrombin. FXIIa, activated factor XII. C1Inh, C1 esterase inhibitor. FXIa, activated factor XI.  $\alpha$ 1AT,  $\alpha$ 1-antitrypsin. FIXa, activated factor IX. FXa, activated factor X. T:AT, thrombin in complex with antithrombin.
